# Supplementary material
Source: publisher figshare collection journal article supplement (https://gsapubs.figshare.com/ndownloader/files/23317598)
Supplement: Supplementary file 1 [file 23317598]

## Sheet: Sheet1
GSA Data Repository Item 2019383 accompanies Biek, R.F., Rowley, P.D., and Hacker,
D.B., 2019, The Gigantic Markagunt and Sevier Gravity Slides Resulting from Mid-Cenozoic
Catastrophic Mega-Scale Failure of the Marysvale Volcanic Field, Utah, USA: Geological
Society of America Field Guide 56, p. 1–108, https://doi.org/10.1130/2019.0056(01).
Table DR1. Latitude and longitude of MGS and SGS localities
Locality	Latitude	Longitude
M1a	37º 42' 39.66"	-112º 33' 03.08"
M1b	37º 42' 43.86"	-112º 34' 14.98"
M1c	37º 43' 05.14"	-112º 34' 58.78"
M1d	37º 44' 12.98"	-112º 35' 31.81"
M2	37º 47' 22.74"	-112º 31' 18.24"
M3a	37º 44' 40"	-112º 35' 24"
M3b	37º 47' 27.30"	-112º 31' 36"
M4	37º 40' 40.5"	-112º 45' 16.0"
M5	37º 42' 29"	-112º 44' 10"
M6a	37º 42' 17"	-112º 47' 39"
M6a west	37º 42' 32"	-112º 47' 28.3"
M6b	37º 41' 30.7"	-112º 48' 39.28"
M7	37º 35' 17"	-112º 52' 12"
M8	37º 45' 26"	-112º 50' 39"
M9	37º 46' 39"	-112º 54' 06"
M10a	37º 59' 22"	-112º 50' 32"
M10b	37º 59' 30"	-112º 54' 25"
M10c	38° 01' 25.2"	-112° 49' 58.2"
M11a	38° 02' 12"	-112° 59' 52"
M11b	38° 05' 23"	-113° 02' 50"
M11b south	38º 00’ 05”	-113º 04’ 36.37”
M12a	37° 57’ 16”	-113 °07’ 38”
M12a west	37° 58’ 07.27”	-113° 09’ 05.83”
M12a east	37° 57’ 58”	-113° 07’ 30.85”
M12b	38° 06’ 09”	-113° 08’ 29.7”
M13	37º 57' 42.36"	-112º 42' 03.42"
M14	37º 50' 20"	-112º 36' 32"
M15	38° 03' 50"	-112° 45' 25"
M16	37º 50' 55"	-112º 38' 56"
M17a	38º 02' 02"	-112º 32' 12.5"
M17b	38º 01' 19"	-112º 32' 00"
M18	37º 58' 14"	-112º 26' 23.50"
M18 east	37º 58' 18"	-112º 26' 18.80"
M19	37º 51' 05.30"	-112º 19' 12.75"
M20a	37º 55' 50.13"	-112º 18' 48.42"
M20b	37º 55' 42"	-112º 18' 28"
M21a	37º 58' 15.8"	-112º 18' 19.9"
M21b	37º 58' 24.50"	-112º 17' 33.30"
M22a	38° 06' 23"	-112° 20' 11"
M22b	38° 07' 53"	-112° 19' 01"
M23a	38° 13' 47"	-112° 16' 33.5"
M23b	38° 12' 24.5"	-112° 15' 14"
M24a	38° 17' 33.7"	-112° 50' 19.5"
M24b	38° 16' 55"	-112° 53' 41"
M24c	38° 13' 18"	-112° 53' 15"
M25	38° 28' 19"	-112° 40' 23"
M26a	38° 28' 29"	-112° 33' 11"
M26b	38° 25' 52"	-112° 32' 20"
M27	38° 23' 09"	-112° 23' 52"
M28	38° 17' 51.5"	-112° 25' 19"
M29	38° 18' 51"	-112° 21' 51"
S1a	37º 41' 02"	-112º 07' 28"
S1b	37º 40' 41.5"	-112º 19' 5.3"
S2	37º 45' 43"	-112º 07' 53.5"
S3a	37º 48' 24"	-112º 12' 09"
S3b	37º 48' 58"	-112º 13' 53"
S4a	37º 54' 00"	-112º 15' 45.5"
S4b	37º 54' 6.01"	-112º 15' 25.74"
S4c	37º 56' 21"	-112º 14' 2.3"
S4d	37º 56' 33"	-112º 14' 30"
S5	38º 00' 3.6"	-112º 16' 9.2"
S6a	37º 56' 42.4"	-112º 06' 42"
S6a basal shear	37º 56' 53.75"	-112º 06' 28.6"
S6a injectites	37º 56' 48.85"	-112º 06' 51"
S6a shear	37º 56' 49.5"	-112º 07' 09.7"
S6b	37º 57' 37.98"	-112º 04' 14.09"
S7	38° 04' 3.9"	-112º 10' 45"
S8	38° 05' 52"	-112° 01' 40"
S9	38º 09' 29"	-111º 56' 01"
S10	38° 11' 32"	-112° 06' 14"
S11	38° 19' 12"	-112° 11' 45"
S12	38° 24' 49.5"	-112° 01' 05"
S13	38° 11' 49"	-111° 56' 03"
